# Supplementary material
Source: publisher figshare collection journal article supplement (https://asha.figshare.com/articles/dataset/_/5912530)
Supplement: Supplementary file 1 [file 1]

## **Supplemental Material S2. Quantitative production analysis (QPA) measures by participant.**

Some general notes for interpreting these data: Baselines 1, 2, and 3 are not referring to the first three baselines during probing, but rather the order of the last three baselines prior to beginning Combined Aphasia and Apraxia of Speech Treatment (CAAST; Wambaugh, Wright, Mauszycki, Nessler, & Bailey, 2017; Wambaugh, Wright, Nessler, & Mauszycki, 2014). Treatments 1, 2, and 3 refer to the final treatment probe during Phases 1, 2, or 3 of treatment. 2-Wk FU and 6-Wk FU refer to the 2-week and 6-week follow-up probes. Untreated sets are indicated in bold script. The QPA includes a count of matrix verbs (i.e., number of verbs in the main clause), but that count is not included here due to space limitations. However, it can be derived by Total Auxiliary Score/(1 + Auxiliary Complexity Index) for each set. For QPA coding and scoring procedures/guidelines, please refer to Saffran, Berndt, and Schwartz (1998), but some additional procedures were necessary for this analysis and are included here.

Nouns Requiring Determiners (NRD): If a noun occurred in isolation, it was not considered to require a determiner (regardless of what the noun was) due to insufficient context to make such a decision. The Determiner Index refers to the proportion of NRDs occurring with a determiner, regardless of appropriateness of the determiner in the syntactic/semantic context.

Inflected Verbs: Verbs were given credit for any inflectional markings, regardless if tense/agreement was accurate for the syntactic context. Inflection Index refers to the proportion of verbs requiring inflection that were inflected. Total auxiliary score is summed for all matrix verbs in the discourse sample (i.e., all responses per stimuli set). Auxiliary Complexity Index (ACI) is the average verb score above base/uninflected form; so, an ACI score of 1.0 indicates that each verb produced had an average of one additional element (such as tense, auxiliary *IS*, modal verb, etc.).

Well-Formed Sentences: QPA instructions are not very detailed regarding what elements are required for well-formedness except "no syntactic errors or missing verb arguments," thus more specific instructions were given for primary and reliability scoring. A sentence was marked well-formed if (a) verb inflection and agreement were appropriate for the syntactic context (regardless of semantic accuracy related to the picture stimuli), (b) any nouns requiring determiners occurred with a determiner, and (c) no other *necessary/appropriate* grammatical elements/functor words were omitted (i.e., obligatory contexts were filled).

## **References**

- Saffran, E. M., Berndt, R. S., & Schwartz, M. F. (1989). The quantitative analysis of agrammatic production: Procedure and data. *Brain and Language*, 37(3), 440–479.
- Wambaugh, J. L., Wright, S., Mauszycki, S. C., Nessler, C., & Bailey, D. J. (2017). Combined Aphasia and Apraxia of Speech Treatment (CAAST): Systematic replications in the development of a novel treatment. *International Journal of Speech-Language Pathology*. Advance online publication. <https://doi.org/10.1080/17549507.2016.1267262>
- Wambaugh, J. L., Wright, S., Nessler, C., & Mauszycki, S. C. (2014). Combined Aphasia and Apraxia of Speech Treatment (CAAST): Effects of a novel therapy. *Journal of Speech, Language, and Hearing Research*, 57(6), 2191–2207. [https://doi.org/10.1044/2014\\_JSLHR-L-14-0004](https://doi.org/10.1044/2014_JSLHR-L-14-0004)

## Participant 1

| Probe       | Total Narrative Words            |             |       | Open-Class Word Count           |             |       | Closed-Class (CC) Word Count     |            |       | Proportion CC Words          |            |       | Noun Count                       |             |       |
|-------------|----------------------------------|-------------|-------|---------------------------------|-------------|-------|----------------------------------|------------|-------|------------------------------|------------|-------|----------------------------------|-------------|-------|
|             | Set 1                            | Set 2       | Set 3 | Set 1                           | Set 2       | Set 3 | Set 1                            | Set 2      | Set 3 | Set 1                        | Set 2      | Set 3 | Set 1                            | Set 2       | Set 3 |
| Baseline 1  | 54                               | <b>60</b>   | 65    | 30                              | <b>33</b>   | 35    | 24                               | <b>27</b>  | 30    | .44                          | <b>.45</b> | .46   | 20                               | <b>18</b>   | 20    |
| Baseline 2  | 48                               | <b>46</b>   | 63    | 28                              | <b>28</b>   | 36    | 20                               | <b>18</b>  | 27    | .42                          | <b>.39</b> | .43   | 16                               | <b>16</b>   | 19    |
| Baseline 3  | 55                               | <b>55</b>   | 68    | 28                              | <b>30</b>   | 37    | 27                               | <b>25</b>  | 31    | .49                          | <b>.45</b> | .46   | 17                               | <b>15</b>   | 20    |
| Treatment 1 | 204                              | <b>114</b>  | 128   | 110                             | <b>54</b>   | 65    | 94                               | <b>60</b>  | 63    | .46                          | <b>.53</b> | .49   | 48                               | <b>18</b>   | 35    |
| 2-Wk FU     | 140                              | <b>133</b>  | 167   | 66                              | <b>64</b>   | 77    | 74                               | <b>69</b>  | 90    | .53                          | <b>.52</b> | .54   | 33                               | <b>27</b>   | 38    |
| 6-Wk FU     | 136                              | <b>91</b>   | 147   | 74                              | <b>46</b>   | 69    | 62                               | <b>45</b>  | 78    | .46                          | <b>.49</b> | .53   | 33                               | <b>23</b>   | 38    |
|             | Nouns Requiring Determiner (NRD) |             |       | NRD with Determiner             |             |       | Determiner Index                 |            |       | Pronoun Count                |            |       | Noun:Pronoun Ratio               |             |       |
|             | Set 1                            | Set 2       | Set 3 | Set 1                           | Set 2       | Set 3 | Set 1                            | Set 2      | Set 3 | Set 1                        | Set 2      | Set 3 | Set 1                            | Set 2       | Set 3 |
| Baseline 1  | 14                               | <b>15</b>   | 19    | 13                              | <b>14</b>   | 15    | .93                              | <b>.93</b> | .79   | 1                            | <b>4</b>   | 3     | 20                               | <b>4.50</b> | 6.67  |
| Baseline 2  | 10                               | <b>14</b>   | 17    | 10                              | <b>13</b>   | 16    | 1.0                              | <b>.93</b> | .94   | 5                            | <b>3</b>   | 7     | 3.20                             | <b>5.33</b> | 2.71  |
| Baseline 3  | 10                               | <b>14</b>   | 16    | 9                               | <b>14</b>   | 14    | .90                              | <b>1.0</b> | .88   | 6                            | <b>2</b>   | 4     | 2.83                             | <b>7.50</b> | 5.0   |
| Treatment 1 | 29                               | <b>12</b>   | 24    | 22                              | <b>12</b>   | 22    | .76                              | <b>1.0</b> | .92   | 25                           | <b>24</b>  | 9     | 1.92                             | <b>0.75</b> | 3.89  |
| 2-Wk FU     | 25                               | <b>23</b>   | 27    | 25                              | <b>22</b>   | 24    | 1.0                              | <b>.96</b> | .89   | 19                           | <b>17</b>  | 28    | 1.74                             | <b>1.59</b> | 1.36  |
| 6-Wk FU     | 23                               | <b>20</b>   | 28    | 22                              | <b>18</b>   | 26    | .96                              | <b>.90</b> | .93   | 13                           | <b>10</b>  | 20    | 2.54                             | <b>2.30</b> | 1.90  |
|             | Verb Count                       |             |       | Noun:Verb Ratio                 |             |       | Verbs Requiring Inflection (VRI) |            |       | VRI with Inflection          |            |       | Inflection Index                 |             |       |
|             | Set 1                            | Set 2       | Set 3 | Set 1                           | Set 2       | Set 3 | Set 1                            | Set 2      | Set 3 | Set 1                        | Set 2      | Set 3 | Set 1                            | Set 2       | Set 3 |
| Baseline 1  | 8                                | <b>11</b>   | 14    | 2.50                            | <b>1.64</b> | 1.43  | 8                                | <b>10</b>  | 13    | 8                            | <b>10</b>  | 10    | 1.0                              | <b>1.0</b>  | .77   |
| Baseline 2  | 12                               | <b>10</b>   | 12    | 1.33                            | <b>1.60</b> | 1.58  | 11                               | <b>10</b>  | 10    | 11                           | <b>10</b>  | 9     | 1.0                              | <b>1.0</b>  | .90   |
| Baseline 3  | 10                               | <b>11</b>   | 13    | 1.70                            | <b>1.36</b> | 1.54  | 10                               | <b>10</b>  | 11    | 9                            | <b>10</b>  | 10    | .90                              | <b>1.0</b>  | .91   |
| Treatment 1 | 47                               | <b>30</b>   | 27    | 1.02                            | <b>0.60</b> | 1.30  | 46                               | <b>29</b>  | 27    | 46                           | <b>28</b>  | 27    | 1.0                              | <b>.97</b>  | 1.0   |
| 2-Wk FU     | 28                               | <b>32</b>   | 33    | 1.18                            | <b>0.84</b> | 1.15  | 26                               | <b>27</b>  | 30    | 25                           | <b>25</b>  | 28    | .96                              | <b>.93</b>  | .93   |
| 6-Wk FU     | 31                               | <b>20</b>   | 26    | 1.06                            | <b>1.15</b> | 1.46  | 28                               | <b>18</b>  | 25    | 28                           | <b>17</b>  | 25    | 1.0                              | <b>.94</b>  | 1.0   |
|             | Total Auxiliary Score            |             |       | Auxiliary Complexity Index      |             |       | Sentence Count                   |            |       | Number of Words in Sentences |            |       | Proportion of Words in Sentences |             |       |
|             | Set 1                            | Set 2       | Set 3 | Set 1                           | Set 2       | Set 3 | Set 1                            | Set 2      | Set 3 | Set 1                        | Set 2      | Set 3 | Set 1                            | Set 2       | Set 3 |
| Baseline 1  | 21                               | <b>22</b>   | 26    | 1.63                            | <b>1.44</b> | 1.17  | 8                                | <b>8</b>   | 9     | 46                           | <b>46</b>  | 51    | .85                              | <b>.77</b>  | .78   |
| Baseline 2  | 19                               | <b>19</b>   | 22    | 1.11                            | <b>0.90</b> | 1.20  | 5                                | <b>7</b>   | 9     | 31                           | <b>27</b>  | 46    | .65                              | <b>.59</b>  | .73   |
| Baseline 3  | 22                               | <b>27</b>   | 27    | 1.20                            | <b>1.70</b> | 1.45  | 10                               | <b>8</b>   | 11    | 55                           | <b>54</b>  | 68    | 1.0                              | <b>.98</b>  | 1.0   |
| Treatment 1 | 101                              | <b>62</b>   | 58    | 2.16                            | <b>1.70</b> | 1.90  | 32                               | <b>23</b>  | 20    | 204                          | <b>114</b> | 119   | 1.0                              | <b>1.0</b>  | .93   |
| 2-Wk FU     | 60                               | <b>57</b>   | 73    | 1.86                            | <b>1.71</b> | 1.81  | 22                               | <b>21</b>  | 25    | 138                          | <b>133</b> | 167   | .99                              | <b>1.0</b>  | 1.0   |
| 6-Wk FU     | 61                               | <b>39</b>   | 59    | 2.05                            | <b>1.44</b> | 1.81  | 20                               | <b>16</b>  | 21    | 136                          | <b>91</b>  | 147   | 1.0                              | <b>1.0</b>  | 1.0   |
|             | Mean Sentence Length             |             |       | Number of Well-Formed Sentences |             |       | Prop. of Well-Formed Sentences   |            |       | Embedded Clause Count        |            |       | Embedding Index                  |             |       |
|             | Set 1                            | Set 2       | Set 3 | Set 1                           | Set 2       | Set 3 | Set 1                            | Set 2      | Set 3 | Set 1                        | Set 2      | Set 3 | Set 1                            | Set 2       | Set 3 |
| Baseline 1  | 5.75                             | <b>5.75</b> | 5.67  | 6                               | <b>5</b>    | 4     | .75                              | <b>.63</b> | .44   | 0                            | <b>1</b>   | 0     | 0                                | <b>.13</b>  | 0     |
| Baseline 2  | 6.20                             | <b>3.86</b> | 5.11  | 5                               | <b>5</b>    | 6     | 1.0                              | <b>.71</b> | .67   | 2                            | <b>0</b>   | 1     | .40                              | <b>0</b>    | .11   |
| Baseline 3  | 5.50                             | <b>6.75</b> | 6.18  | 7                               | <b>6</b>    | 7     | .70                              | <b>.75</b> | .64   | 0                            | <b>1</b>   | 1     | 0                                | <b>.13</b>  | .09   |
| Treatment 1 | 6.38                             | <b>4.96</b> | 5.95  | 23                              | <b>15</b>   | 15    | .72                              | <b>.65</b> | .75   | 0                            | <b>1</b>   | 1     | 0                                | <b>.04</b>  | .05   |
| 2-Wk FU     | 6.27                             | <b>6.33</b> | 6.68  | 18                              | <b>16</b>   | 20    | .82                              | <b>.76</b> | .80   | 3                            | <b>5</b>   | 1     | .14                              | <b>.24</b>  | .04   |
| 6-Wk FU     | 6.80                             | <b>5.69</b> | 7.0   | 16                              | <b>11</b>   | 14    | .80                              | <b>.69</b> | .67   | 6                            | <b>3</b>   | 1     | .30                              | <b>.19</b>  | .05   |

## Participant 2

| Probe       | Total Narrative Words            |            |       | Open-Class Word Count           |              |       | Closed-Class (CC) Word Count     |            |       | Proportion CC Words          |            |       | Noun Count                       |             |       |
|-------------|----------------------------------|------------|-------|---------------------------------|--------------|-------|----------------------------------|------------|-------|------------------------------|------------|-------|----------------------------------|-------------|-------|
|             | Set 1                            | Set 2      | Set 3 | Set 1                           | Set 2        | Set 3 | Set 1                            | Set 2      | Set 3 | Set 1                        | Set 2      | Set 3 | Set 1                            | Set 2       | Set 3 |
| Baseline 1  | 70                               | <b>69</b>  | 43    | 62                              | <b>62</b>    | 41    | 8                                | <b>7</b>   | 2     | .11                          | <b>.10</b> | .05   | 49                               | <b>42</b>   | 28    |
| Baseline 2  | 36                               | <b>39</b>  | 34    | 32                              | <b>37</b>    | 31    | 4                                | <b>2</b>   | 3     | .11                          | <b>.05</b> | .09   | 26                               | <b>25</b>   | 26    |
| Baseline 3  | 49                               | <b>45</b>  | 53    | 41                              | <b>41</b>    | 48    | 8                                | <b>4</b>   | 5     | .16                          | <b>.09</b> | .09   | 33                               | <b>35</b>   | 41    |
| Treatment 1 | 77                               | <b>33</b>  | 72    | 72                              | <b>31</b>    | 68    | 5                                | <b>2</b>   | 4     | .06                          | <b>.06</b> | .06   | 52                               | <b>25</b>   | 55    |
| Treatment 2 | 83                               | <b>72</b>  | 72    | 78                              | <b>67</b>    | 65    | 5                                | <b>5</b>   | 7     | .06                          | <b>.07</b> | .10   | 75                               | <b>61</b>   | 64    |
| 2-Wk FU     | 91                               | <b>72</b>  | 81    | 83                              | <b>60</b>    | 74    | 8                                | <b>12</b>  | 7     | .09                          | <b>.17</b> | .09   | 70                               | <b>54</b>   | 66    |
| 6-Wk FU     | 74                               | <b>82</b>  | 78    | 70                              | <b>77</b>    | 77    | 4                                | <b>5</b>   | 1     | .05                          | <b>.06</b> | .01   | 58                               | <b>64</b>   | 66    |
|             | Nouns Requiring Determiner (NRD) |            |       | NRD with Determiner             |              |       | Determiner Index                 |            |       | Pronoun Count                |            |       | Noun:Pronoun Ratio               |             |       |
|             | Set 1                            | Set 2      | Set 3 | Set 1                           | Set 2        | Set 3 | Set 1                            | Set 2      | Set 3 | Set 1                        | Set 2      | Set 3 | Set 1                            | Set 2       | Set 3 |
| Baseline 1  | 0                                | <b>0</b>   | 3     | 0                               | <b>0</b>     | 0     | 0                                | <b>0</b>   | 0     | 1                            | <b>0</b>   | 0     | 49.0                             | <b>0</b>    | 0     |
| Baseline 2  | 0                                | <b>0</b>   | 1     | 0                               | <b>0</b>     | 0     | 0                                | <b>0</b>   | 0     | 2                            | <b>1</b>   | 1     | 13.0                             | <b>25.0</b> | 26.0  |
| Baseline 3  | 0                                | <b>0</b>   | 0     | 0                               | <b>0</b>     | 0     | 0                                | <b>0</b>   | 0     | 7                            | <b>1</b>   | 1     | 4.71                             | <b>35.0</b> | 41.0  |
| Treatment 1 | 1                                | <b>1</b>   | 2     | 0                               | <b>1</b>     | 0     | 0                                | <b>1.0</b> | 0     | 4                            | <b>0</b>   | 1     | 13.0                             | <b>0</b>    | 55.0  |
| Treatment 2 | 0                                | <b>1</b>   | 0     | 0                               | <b>0</b>     | 0     | 0                                | <b>0</b>   | 0     | 0                            | <b>0</b>   | 0     | 0                                | <b>0</b>    | 0     |
| 2-Wk FU     | 10                               | <b>3</b>   | 8     | 2                               | <b>0</b>     | 2     | .20                              | <b>0</b>   | .25   | 3                            | <b>9</b>   | 1     | 23.30                            | <b>6.0</b>  | 66.0  |
| 6-Wk FU     | 7                                | <b>13</b>  | 10    | 0                               | <b>0</b>     | 0     | 0                                | <b>0</b>   | 0     | 0                            | <b>1</b>   | 0     | 0                                | <b>64.0</b> | 0     |
|             | Verb Count                       |            |       | Noun:Verb Ratio                 |              |       | Verbs Requiring Inflection (VRI) |            |       | VRI with Inflection          |            |       | Inflection Index                 |             |       |
|             | Set 1                            | Set 2      | Set 3 | Set 1                           | Set 2        | Set 3 | Set 1                            | Set 2      | Set 3 | Set 1                        | Set 2      | Set 3 | Set 1                            | Set 2       | Set 3 |
| Baseline 1  | 8                                | <b>15</b>  | 9     | 6.13                            | <b>2.80</b>  | 3.11  | 8                                | <b>15</b>  | 9     | 5                            | <b>7</b>   | 3     | .63                              | <b>.47</b>  | .33   |
| Baseline 2  | 5                                | <b>6</b>   | 2     | 5.20                            | <b>4.17</b>  | 13.0  | 5                                | <b>5</b>   | 2     | 2                            | <b>4</b>   | 2     | .40                              | <b>.80</b>  | 1.0   |
| Baseline 3  | 5                                | <b>2</b>   | 3     | 6.60                            | <b>17.50</b> | 13.67 | 4                                | <b>2</b>   | 3     | 0                            | <b>1</b>   | 0     | 0                                | <b>.50</b>  | 0     |
| Treatment 1 | 19                               | <b>5</b>   | 13    | 2.74                            | <b>5.0</b>   | 4.23  | 16                               | <b>5</b>   | 12    | 10                           | <b>5</b>   | 9     | .63                              | <b>1.0</b>  | .75   |
| Treatment 2 | 3                                | <b>5</b>   | 1     | 25.0                            | <b>12.20</b> | 64.0  | 3                                | <b>5</b>   | 1     | 2                            | <b>3</b>   | 1     | .67                              | <b>.60</b>  | 1.0   |
| 2-Wk FU     | 13                               | <b>5</b>   | 8     | 5.38                            | <b>10.80</b> | 8.25  | 13                               | <b>5</b>   | 8     | 8                            | <b>2</b>   | 6     | .62                              | <b>.40</b>  | .75   |
| 6-Wk FU     | 11                               | <b>14</b>  | 11    | 5.27                            | <b>4.57</b>  | 6.0   | 11                               | <b>14</b>  | 11    | 9                            | <b>13</b>  | 10    | .82                              | <b>.93</b>  | .91   |
|             | Total Auxiliary Score            |            |       | Auxiliary Complexity Index      |              |       | Sentence Count                   |            |       | Number of Words in Sentences |            |       | Proportion of Words in Sentences |             |       |
|             | Set 1                            | Set 2      | Set 3 | Set 1                           | Set 2        | Set 3 | Set 1                            | Set 2      | Set 3 | Set 1                        | Set 2      | Set 3 | Set 1                            | Set 2       | Set 3 |
| Baseline 1  | 9                                | <b>19</b>  | 11    | 0.13                            | <b>0.27</b>  | 0.22  | 0                                | <b>0</b>   | 3     | 0                            | <b>0</b>   | 6     | 0                                | <b>0</b>    | .14   |
| Baseline 2  | 5                                | <b>10</b>  | 4     | 0                               | <b>0.67</b>  | 1.0   | 2                                | <b>1</b>   | 0     | 4                            | <b>2</b>   | 0     | .11                              | <b>.05</b>  | 0     |
| Baseline 3  | 5                                | <b>3</b>   | 3     | 0                               | <b>0.50</b>  | 0     | 1                                | <b>0</b>   | 0     | 2                            | <b>0</b>   | 0     | .04                              | <b>0</b>    | 0     |
| Treatment 1 | 29                               | <b>10</b>  | 22    | 0.53                            | <b>1.0</b>   | 0.69  | 3                                | <b>1</b>   | 2     | 7                            | <b>3</b>   | 4     | .09                              | <b>.09</b>  | .06   |
| Treatment 2 | 5                                | <b>8</b>   | 2     | 0.67                            | <b>0.60</b>  | 1.0   | 0                                | <b>0</b>   | 0     | 0                            | <b>0</b>   | 0     | 0                                | <b>0</b>    | 0     |
| 2-Wk FU     | 16                               | <b>6</b>   | 11    | 0.23                            | <b>0.20</b>  | 0.38  | 6                                | <b>1</b>   | 3     | 12                           | <b>2</b>   | 6     | .13                              | <b>.03</b>  | .07   |
| 6-Wk FU     | 18                               | <b>14</b>  | 11    | 0.64                            | <b>0</b>     | 0     | 7                                | <b>14</b>  | 11    | 16                           | <b>28</b>  | 22    | .22                              | <b>.34</b>  | .28   |
|             | Mean Sentence Length             |            |       | Number of Well-Formed Sentences |              |       | Prop. of Well-Formed Sentences   |            |       | Embedded Clause Count        |            |       | Embedding Index                  |             |       |
|             | Set 1                            | Set 2      | Set 3 | Set 1                           | Set 2        | Set 3 | Set 1                            | Set 2      | Set 3 | Set 1                        | Set 2      | Set 3 | Set 1                            | Set 2       | Set 3 |
| Baseline 1  | 0                                | <b>0</b>   | 2.0   | 0                               | <b>0</b>     | 0     | 0                                | <b>0</b>   | 0     | 0                            | <b>0</b>   | 0     | 0                                | <b>0</b>    | 0     |
| Baseline 2  | 2.0                              | <b>2.0</b> | 0     | 0                               | <b>0</b>     | 0     | 0                                | <b>0</b>   | 0     | 0                            | <b>0</b>   | 0     | 0                                | <b>0</b>    | 0     |
| Baseline 3  | 2.0                              | <b>0</b>   | 0     | 0                               | <b>0</b>     | 0     | 0                                | <b>0</b>   | 0     | 0                            | <b>0</b>   | 0     | 0                                | <b>0</b>    | 0     |
| Treatment 1 | 2.33                             | <b>3.0</b> | 2.0   | 1                               | <b>0</b>     | 0     | .33                              | <b>0</b>   | 0     | 0                            | <b>0</b>   | 0     | 0                                | <b>0</b>    | 0     |
| Treatment 2 | 0                                | <b>0</b>   | 0     | 0                               | <b>0</b>     | 0     | 0                                | <b>0</b>   | 0     | 0                            | <b>0</b>   | 0     | 0                                | <b>0</b>    | 0     |
| 2-Wk FU     | 2.0                              | <b>2.0</b> | 2.0   | 0                               | <b>0</b>     | 0     | 0                                | <b>0</b>   | 0     | 0                            | <b>0</b>   | 0     | 0                                | <b>0</b>    | 0     |
| 6-Wk FU     | 2.29                             | <b>2.0</b> | 2.0   | 0                               | <b>0</b>     | 1     | 0                                | <b>0</b>   | .09   | 0                            | <b>0</b>   | 0     | 0                                | <b>0</b>    | 0     |

## Participant 3

| Probe       | Total Narrative Words            |             |       | Open-Class Word Count           |             |       | Closed-Class (CC) Word Count     |            |       | Proportion CC Words          |            |       | Noun Count                       |             |       |
|-------------|----------------------------------|-------------|-------|---------------------------------|-------------|-------|----------------------------------|------------|-------|------------------------------|------------|-------|----------------------------------|-------------|-------|
|             | Set 1                            | Set 2       | Set 3 | Set 1                           | Set 2       | Set 3 | Set 1                            | Set 2      | Set 3 | Set 1                        | Set 2      | Set 3 | Set 1                            | Set 2       | Set 3 |
| Baseline 1  | 46                               | <b>56</b>   | 41    | 33                              | <b>39</b>   | 24    | 13                               | <b>17</b>  | 17    | .28                          | <b>.30</b> | .41   | 13                               | <b>12</b>   | 7     |
| Baseline 2  | 42                               | <b>32</b>   | 34    | 30                              | <b>22</b>   | 21    | 12                               | <b>10</b>  | 13    | .29                          | <b>.31</b> | .38   | 14                               | <b>13</b>   | 7     |
| Baseline 3  | 54                               | <b>55</b>   | 37    | 33                              | <b>33</b>   | 23    | 21                               | <b>22</b>  | 14    | .39                          | <b>.40</b> | .38   | 15                               | <b>11</b>   | 6     |
| Treatment 1 | 120                              | <b>110</b>  | 124   | 87                              | <b>86</b>   | 97    | 33                               | <b>24</b>  | 27    | .28                          | <b>.22</b> | .22   | 67                               | <b>59</b>   | 70    |
| Treatment 2 | 224                              | <b>223</b>  | 225   | 145                             | <b>156</b>  | 160   | 79                               | <b>67</b>  | 65    | .35                          | <b>.30</b> | .29   | 85                               | <b>99</b>   | 105   |
| 2-Wk FU     | 194                              | <b>314</b>  | 299   | 127                             | <b>184</b>  | 171   | 67                               | <b>130</b> | 128   | .35                          | <b>.41</b> | .43   | 82                               | <b>92</b>   | 91    |
| 6-Wk FU     | 230                              | <b>261</b>  | 245   | 137                             | <b>155</b>  | 152   | 93                               | <b>106</b> | 93    | .40                          | <b>.41</b> | .38   | 74                               | <b>85</b>   | 96    |
|             | Nouns Requiring Determiner (NRD) |             |       | NRD with Determiner             |             |       | Determiner Index                 |            |       | Pronoun Count                |            |       | Noun:Pronoun Ratio               |             |       |
|             | Set 1                            | Set 2       | Set 3 | Set 1                           | Set 2       | Set 3 | Set 1                            | Set 2      | Set 3 | Set 1                        | Set 2      | Set 3 | Set 1                            | Set 2       | Set 3 |
| Baseline 1  | 4                                | <b>1</b>    | 3     | 3                               | <b>1</b>    | 2     | .75                              | <b>1.0</b> | .67   | 8                            | <b>9</b>   | 6     | 1.63                             | <b>1.33</b> | 1.17  |
| Baseline 2  | 0                                | <b>2</b>    | 1     | 0                               | <b>2</b>    | 0     | 0                                | <b>1.0</b> | 0     | 7                            | <b>4</b>   | 6     | 2.0                              | <b>3.25</b> | 1.17  |
| Baseline 3  | 3                                | <b>2</b>    | 3     | 2                               | <b>1</b>    | 1     | .67                              | <b>.50</b> | .33   | 10                           | <b>11</b>  | 4     | 1.50                             | <b>1.0</b>  | 1.50  |
| Treatment 1 | 6                                | <b>5</b>    | 9     | 4                               | <b>2</b>    | 2     | .67                              | <b>.40</b> | .22   | 15                           | <b>13</b>  | 14    | 4.47                             | <b>4.54</b> | 5.0   |
| Treatment 2 | 8                                | <b>8</b>    | 14    | 3                               | <b>6</b>    | 8     | .38                              | <b>.75</b> | .57   | 42                           | <b>30</b>  | 27    | 2.02                             | <b>3.30</b> | 3.89  |
| 2-Wk FU     | 5                                | <b>16</b>   | 23    | 1                               | <b>10</b>   | 11    | .20                              | <b>.63</b> | .48   | 36                           | <b>51</b>  | 55    | 2.28                             | <b>1.80</b> | 1.65  |
| 6-Wk FU     | 6                                | <b>14</b>   | 12    | 4                               | <b>8</b>    | 8     | .67                              | <b>.57</b> | .67   | 41                           | <b>46</b>  | 40    | 1.80                             | <b>1.85</b> | 2.40  |
|             | Verb Count                       |             |       | Noun:Verb Ratio                 |             |       | Verbs Requiring Inflection (VRI) |            |       | VRI with Inflection          |            |       | Inflection Index                 |             |       |
|             | Set 1                            | Set 2       | Set 3 | Set 1                           | Set 2       | Set 3 | Set 1                            | Set 2      | Set 3 | Set 1                        | Set 2      | Set 3 | Set 1                            | Set 2       | Set 3 |
| Baseline 1  | 13                               | <b>17</b>   | 12    | 1.0                             | <b>0.71</b> | 0.58  | 10                               | <b>16</b>  | 11    | 10                           | <b>13</b>  | 10    | 1.0                              | <b>.81</b>  | .91   |
| Baseline 2  | 11                               | <b>7</b>    | 10    | 1.27                            | <b>1.86</b> | 0.70  | 10                               | <b>6</b>   | 10    | 7                            | <b>5</b>   | 7     | .70                              | <b>.83</b>  | .70   |
| Baseline 3  | 14                               | <b>17</b>   | 13    | 1.07                            | <b>0.65</b> | 0.46  | 14                               | <b>12</b>  | 11    | 12                           | <b>11</b>  | 10    | .86                              | <b>.92</b>  | .91   |
| Treatment 1 | 15                               | <b>18</b>   | 22    | 4.47                            | <b>3.28</b> | 3.18  | 15                               | <b>18</b>  | 22    | 12                           | <b>18</b>  | 16    | .80                              | <b>1.0</b>  | .73   |
| Treatment 2 | 38                               | <b>34</b>   | 37    | 2.24                            | <b>2.91</b> | 2.84  | 35                               | <b>33</b>  | 36    | 30                           | <b>23</b>  | 31    | .86                              | <b>.70</b>  | .86   |
| 2-Wk FU     | 34                               | <b>59</b>   | 64    | 2.41                            | <b>1.56</b> | 1.42  | 33                               | <b>55</b>  | 57    | 28                           | <b>45</b>  | 49    | .85                              | <b>.82</b>  | .86   |
| 6-Wk FU     | 39                               | <b>49</b>   | 40    | 1.90                            | <b>1.73</b> | 2.40  | 34                               | <b>41</b>  | 33    | 32                           | <b>35</b>  | 28    | .94                              | <b>.85</b>  | .85   |
|             | Total Auxiliary Score            |             |       | Auxiliary Complexity Index      |             |       | Sentence Count                   |            |       | Number of Words in Sentences |            |       | Proportion of Words in Sentences |             |       |
|             | Set 1                            | Set 2       | Set 3 | Set 1                           | Set 2       | Set 3 | Set 1                            | Set 2      | Set 3 | Set 1                        | Set 2      | Set 3 | Set 1                            | Set 2       | Set 3 |
| Baseline 1  | 19                               | <b>21</b>   | 22    | 0.58                            | <b>0.24</b> | 1.0   | 6                                | <b>10</b>  | 6     | 21                           | <b>34</b>  | 20    | .46                              | <b>.61</b>  | .49   |
| Baseline 2  | 17                               | <b>12</b>   | 17    | 0.55                            | <b>0.71</b> | 0.70  | 7                                | <b>5</b>   | 6     | 21                           | <b>14</b>  | 18    | .50                              | <b>.44</b>  | .53   |
| Baseline 3  | 27                               | <b>21</b>   | 18    | 0.93                            | <b>0.24</b> | 0.50  | 10                               | <b>12</b>  | 5     | 38                           | <b>38</b>  | 18    | .70                              | <b>.69</b>  | .49   |
| Treatment 1 | 34                               | <b>34</b>   | 36    | 1.27                            | <b>0.89</b> | 0.71  | 11                               | <b>13</b>  | 16    | 45                           | <b>43</b>  | 51    | .38                              | <b>.39</b>  | .41   |
| Treatment 2 | 67                               | <b>55</b>   | 61    | 0.97                            | <b>0.67</b> | 0.79  | 30                               | <b>29</b>  | 26    | 118                          | <b>122</b> | 118   | .53                              | <b>.55</b>  | .52   |
| 2-Wk FU     | 73                               | <b>119</b>  | 108   | 1.35                            | <b>1.13</b> | 1.04  | 30                               | <b>46</b>  | 45    | 118                          | <b>204</b> | 207   | .61                              | <b>.65</b>  | .69   |
| 6-Wk FU     | 73                               | <b>92</b>   | 77    | 1.21                            | <b>1.30</b> | 1.14  | 31                               | <b>40</b>  | 31    | 132                          | <b>173</b> | 124   | .57                              | <b>.66</b>  | .51   |
|             | Mean Sentence Length             |             |       | Number of Well-Formed Sentences |             |       | Prop. of Well-Formed Sentences   |            |       | Embedded Clause Count        |            |       | Embedding Index                  |             |       |
|             | Set 1                            | Set 2       | Set 3 | Set 1                           | Set 2       | Set 3 | Set 1                            | Set 2      | Set 3 | Set 1                        | Set 2      | Set 3 | Set 1                            | Set 2       | Set 3 |
| Baseline 1  | 3.50                             | <b>3.40</b> | 3.33  | 4                               | <b>10</b>   | 5     | .67                              | <b>1.0</b> | .83   | 1                            | <b>0</b>   | 1     | .17                              | <b>0</b>    | .17   |
| Baseline 2  | 3.0                              | <b>2.80</b> | 3.0   | 6                               | <b>3</b>    | 2     | .86                              | <b>.60</b> | .33   | 0                            | <b>0</b>   | 0     | 0                                | <b>0</b>    | 0     |
| Baseline 3  | 3.80                             | <b>3.17</b> | 3.60  | 5                               | <b>7</b>    | 3     | .50                              | <b>.58</b> | .60   | 0                            | <b>1</b>   | 1     | 0                                | <b>.08</b>  | .20   |
| Treatment 1 | 4.09                             | <b>3.31</b> | 3.19  | 6                               | <b>10</b>   | 4     | .55                              | <b>.77</b> | .25   | 0                            | <b>0</b>   | 0     | 0                                | <b>0</b>    | 0     |
| Treatment 2 | 3.93                             | <b>4.21</b> | 4.54  | 19                              | <b>16</b>   | 16    | .63                              | <b>.55</b> | .62   | 1                            | <b>1</b>   | 2     | .03                              | <b>.03</b>  | .08   |
| 2-Wk FU     | 3.93                             | <b>4.43</b> | 4.60  | 20                              | <b>29</b>   | 21    | .67                              | <b>.63</b> | .47   | 2                            | <b>2</b>   | 6     | .07                              | <b>.04</b>  | .13   |
| 6-Wk FU     | 4.26                             | <b>4.33</b> | 4.0   | 17                              | <b>27</b>   | 20    | .55                              | <b>.68</b> | .65   | 4                            | <b>4</b>   | 0     | .13                              | <b>.10</b>  | 0     |

## Participant 4

| Probe       | Total Narrative Words            |       |       | Open-Class Word Count           |       |       | Closed-Class (CC) Word Count     |       |       | Proportion CC Words          |       |       | Noun Count                       |       |       |
|-------------|----------------------------------|-------|-------|---------------------------------|-------|-------|----------------------------------|-------|-------|------------------------------|-------|-------|----------------------------------|-------|-------|
|             | Set 1                            | Set 2 | Set 3 | Set 1                           | Set 2 | Set 3 | Set 1                            | Set 2 | Set 3 | Set 1                        | Set 2 | Set 3 | Set 1                            | Set 2 | Set 3 |
| Baseline 1  | <b>33</b>                        | 19    | 21    | <b>23</b>                       | 14    | 17    | <b>10</b>                        | 5     | 4     | <b>.30</b>                   | .26   | .19   | <b>15</b>                        | 9     | 8     |
| Baseline 2  | <b>18</b>                        | 23    | 9     | <b>17</b>                       | 15    | 8     | <b>1</b>                         | 8     | 1     | <b>.06</b>                   | .35   | .11   | <b>10</b>                        | 7     | 2     |
| Baseline 3  | <b>7</b>                         | 20    | 15    | <b>6</b>                        | 14    | 15    | <b>1</b>                         | 6     | 0     | <b>.14</b>                   | .30   | 0     | <b>5</b>                         | 10    | 7     |
| Treatment 1 | <b>36</b>                        | 45    | 42    | <b>24</b>                       | 23    | 28    | <b>12</b>                        | 22    | 14    | <b>.33</b>                   | .49   | .33   | <b>16</b>                        | 18    | 15    |
| Treatment 2 | <b>47</b>                        | 61    | 51    | <b>27</b>                       | 29    | 31    | <b>20</b>                        | 32    | 20    | <b>.43</b>                   | .52   | .39   | <b>16</b>                        | 18    | 22    |
| 2-Wk FU     | <b>47</b>                        | 51    | 66    | <b>28</b>                       | 28    | 32    | <b>19</b>                        | 23    | 34    | <b>.40</b>                   | .45   | .52   | <b>19</b>                        | 17    | 19    |
| 6-Wk FU     | <b>69</b>                        | 65    | 73    | <b>34</b>                       | 36    | 40    | <b>35</b>                        | 29    | 33    | <b>.51</b>                   | .45   | .45   | <b>23</b>                        | 24    | 27    |
|             | Nouns Requiring Determiner (NRD) |       |       | NRD with Determiner             |       |       | Determiner Index                 |       |       | Pronoun Count                |       |       | Noun:Pronoun Ratio               |       |       |
|             | Set 1                            | Set 2 | Set 3 | Set 1                           | Set 2 | Set 3 | Set 1                            | Set 2 | Set 3 | Set 1                        | Set 2 | Set 3 | Set 1                            | Set 2 | Set 3 |
| Baseline 1  | <b>3</b>                         | 3     | 0     | <b>1</b>                        | 1     | 0     | <b>.33</b>                       | .33   | 0     | <b>3</b>                     | 1     | 3     | <b>5.0</b>                       | 9.0   | 2.67  |
| Baseline 2  | <b>1</b>                         | 2     | 0     | <b>1</b>                        | 1     | 0     | <b>1.0</b>                       | .50   | 0     | <b>0</b>                     | 3     | 0     | <b>0</b>                         | 2.33  | 0     |
| Baseline 3  | <b>2</b>                         | 4     | 2     | <b>0</b>                        | 1     | 0     | <b>0</b>                         | .25   | 0     | <b>0</b>                     | 0     | 0     | <b>0</b>                         | 0     | 0     |
| Treatment 1 | <b>8</b>                         | 17    | 14    | <b>3</b>                        | 11    | 5     | <b>.38</b>                       | .65   | .36   | <b>1</b>                     | 0     | 0     | <b>16.0</b>                      | 0     | 0     |
| Treatment 2 | <b>12</b>                        | 16    | 9     | <b>10</b>                       | 16    | 7     | <b>.83</b>                       | 1.0   | .78   | <b>2</b>                     | 1     | 3     | <b>8.0</b>                       | 18.0  | 7.33  |
| 2-Wk FU     | <b>12</b>                        | 14    | 14    | <b>11</b>                       | 11    | 12    | <b>.92</b>                       | .79   | .86   | <b>1</b>                     | 1     | 4     | <b>19.0</b>                      | 17.0  | 4.75  |
| 6-Wk FU     | <b>18</b>                        | 17    | 21    | <b>13</b>                       | 11    | 9     | <b>.72</b>                       | .65   | .43   | <b>3</b>                     | 2     | 4     | <b>7.67</b>                      | 12.0  | 6.75  |
|             | Verb Count                       |       |       | Noun:Verb Ratio                 |       |       | Verbs Requiring Inflection (VRI) |       |       | VRI with Inflection          |       |       | Inflection Index                 |       |       |
|             | Set 1                            | Set 2 | Set 3 | Set 1                           | Set 2 | Set 3 | Set 1                            | Set 2 | Set 3 | Set 1                        | Set 2 | Set 3 | Set 1                            | Set 2 | Set 3 |
| Baseline 1  | <b>6</b>                         | 4     | 7     | <b>2.50</b>                     | 2.25  | 1.14  | <b>3</b>                         | 4     | 6     | <b>3</b>                     | 4     | 6     | <b>1.0</b>                       | 1.0   | 1.0   |
| Baseline 2  | <b>6</b>                         | 8     | 4     | <b>1.67</b>                     | 0.88  | 0.50  | <b>6</b>                         | 8     | 4     | <b>4</b>                     | 4     | 4     | <b>.67</b>                       | .50   | 1.0   |
| Baseline 3  | <b>1</b>                         | 4     | 7     | <b>5.0</b>                      | 2.50  | 1.0   | <b>1</b>                         | 4     | 7     | <b>1</b>                     | 3     | 6     | <b>1.0</b>                       | .75   | .86   |
| Treatment 1 | <b>8</b>                         | 5     | 9     | <b>2.0</b>                      | 3.60  | 1.67  | <b>7</b>                         | 5     | 9     | <b>7</b>                     | 5     | 9     | <b>1.0</b>                       | 1.0   | 1.0   |
| Treatment 2 | <b>9</b>                         | 11    | 6     | <b>1.78</b>                     | 1.64  | 3.67  | <b>9</b>                         | 11    | 6     | <b>9</b>                     | 11    | 6     | <b>1.0</b>                       | 1.0   | 1.0   |
| 2-Wk FU     | <b>9</b>                         | 11    | 11    | <b>2.11</b>                     | 1.55  | 1.73  | <b>8</b>                         | 11    | 11    | <b>8</b>                     | 11    | 11    | <b>1.0</b>                       | 1.0   | 1.0   |
| 6-Wk FU     | <b>9</b>                         | 10    | 12    | <b>2.56</b>                     | 2.40  | 2.25  | <b>9</b>                         | 10    | 12    | <b>9</b>                     | 9     | 12    | <b>1.0</b>                       | .90   | 1.0   |
|             | Total Auxiliary Score            |       |       | Auxiliary Complexity Index      |       |       | Sentence Count                   |       |       | Number of Words in Sentences |       |       | Proportion of Words in Sentences |       |       |
|             | Set 1                            | Set 2 | Set 3 | Set 1                           | Set 2 | Set 3 | Set 1                            | Set 2 | Set 3 | Set 1                        | Set 2 | Set 3 | Set 1                            | Set 2 | Set 3 |
| Baseline 1  | <b>8</b>                         | 7     | 12    | <b>1.0</b>                      | 0.75  | 0.71  | <b>3</b>                         | 1     | 2     | <b>10</b>                    | 3     | 5     | <b>.30</b>                       | .16   | .24   |
| Baseline 2  | <b>10</b>                        | 11    | 8     | <b>0.67</b>                     | 0.38  | 1.0   | <b>0</b>                         | 2     | 0     | <b>0</b>                     | 6     | 0     | <b>0</b>                         | .26   | 0     |
| Baseline 3  | <b>2</b>                         | 8     | 13    | <b>1.0</b>                      | 1.0   | 0.86  | <b>0</b>                         | 2     | 2     | <b>0</b>                     | 11    | 4     | <b>0</b>                         | .55   | .27   |
| Treatment 1 | <b>15</b>                        | 13    | 18    | <b>1.50</b>                     | 1.60  | 1.0   | <b>6</b>                         | 5     | 9     | <b>23</b>                    | 27    | 35    | <b>.64</b>                       | .60   | .83   |
| Treatment 2 | <b>19</b>                        | 24    | 16    | <b>1.11</b>                     | 1.40  | 1.67  | <b>9</b>                         | 10    | 5     | <b>46</b>                    | 61    | 30    | <b>.98</b>                       | 1.0   | .59   |
| 2-Wk FU     | <b>16</b>                        | 21    | 27    | <b>1.29</b>                     | 0.91  | 1.45  | <b>7</b>                         | 11    | 11    | <b>36</b>                    | 51    | 65    | <b>.77</b>                       | 1.0   | .98   |
| 6-Wk FU     | <b>21</b>                        | 18    | 20    | <b>1.63</b>                     | 1.0   | 1.0   | <b>8</b>                         | 9     | 10    | <b>56</b>                    | 52    | 62    | <b>.81</b>                       | .80   | .85   |
|             | Mean Sentence Length             |       |       | Number of Well-Formed Sentences |       |       | Prop. of Well-Formed Sentences   |       |       | Embedded Clause Count        |       |       | Embedding Index                  |       |       |
|             | Set 1                            | Set 2 | Set 3 | Set 1                           | Set 2 | Set 3 | Set 1                            | Set 2 | Set 3 | Set 1                        | Set 2 | Set 3 | Set 1                            | Set 2 | Set 3 |
| Baseline 1  | <b>3.33</b>                      | 3.0   | 2.50  | <b>2</b>                        | 1     | 1     | <b>.67</b>                       | 1.0   | .50   | <b>0</b>                     | 0     | 0     | <b>0</b>                         | 0     | 0     |
| Baseline 2  | <b>0</b>                         | 3.0   | 0     | <b>0</b>                        | 0     | 0     | <b>0</b>                         | 0     | 0     | <b>0</b>                     | 0     | 0     | <b>0</b>                         | 0     | 0     |
| Baseline 3  | <b>0</b>                         | 5.50  | 2.0   | <b>0</b>                        | 0     | 0     | <b>0</b>                         | 0     | 0     | <b>0</b>                     | 0     | 0     | <b>0</b>                         | 0     | 0     |
| Treatment 1 | <b>3.83</b>                      | 5.40  | 3.89  | <b>3</b>                        | 3     | 0     | <b>.50</b>                       | .60   | 0     | <b>0</b>                     | 0     | 0     | <b>0</b>                         | 0     | 0     |
| Treatment 2 | <b>5.11</b>                      | 6.10  | 6.0   | <b>3</b>                        | 3     | 4     | <b>.33</b>                       | .30   | .80   | <b>0</b>                     | 1     | 0     | <b>0</b>                         | .10   | 0     |
| 2-Wk FU     | <b>5.14</b>                      | 4.64  | 5.91  | <b>4</b>                        | 3     | 6     | <b>.57</b>                       | .27   | .55   | <b>1</b>                     | 0     | 0     | <b>.14</b>                       | 0     | 0     |
| 6-Wk FU     | <b>7.0</b>                       | 5.78  | 6.20  | <b>5</b>                        | 2     | 1     | <b>.63</b>                       | .22   | .10   | <b>1</b>                     | 1     | 2     | <b>.13</b>                       | .11   | .20   |

## Participant 5

| Probe       | Total Narrative Words            |       |       | Open-Class Word Count           |       |       | Closed-Class (CC) Word Count     |       |       | Proportion CC Words          |       |       | Noun Count                       |       |       |
|-------------|----------------------------------|-------|-------|---------------------------------|-------|-------|----------------------------------|-------|-------|------------------------------|-------|-------|----------------------------------|-------|-------|
|             | Set 1                            | Set 2 | Set 3 | Set 1                           | Set 2 | Set 3 | Set 1                            | Set 2 | Set 3 | Set 1                        | Set 2 | Set 3 | Set 1                            | Set 2 | Set 3 |
| Baseline 1  | <b>49</b>                        | 47    | 48    | <b>34</b>                       | 28    | 28    | <b>15</b>                        | 19    | 20    | <b>.31</b>                   | .40   | .42   | <b>16</b>                        | 18    | 19    |
| Baseline 2  | <b>38</b>                        | 45    | 40    | <b>31</b>                       | 30    | 27    | <b>7</b>                         | 15    | 13    | <b>.18</b>                   | .33   | .33   | <b>20</b>                        | 18    | 19    |
| Baseline 3  | <b>46</b>                        | 43    | 41    | <b>32</b>                       | 26    | 29    | <b>14</b>                        | 17    | 12    | <b>.30</b>                   | .40   | .29   | <b>18</b>                        | 17    | 18    |
| Treatment 1 | <b>107</b>                       | 145   | 97    | <b>58</b>                       | 83    | 51    | <b>49</b>                        | 62    | 46    | <b>.46</b>                   | .43   | .47   | <b>20</b>                        | 31    | 23    |
| Treatment 2 | <b>124</b>                       | 167   | 170   | <b>69</b>                       | 97    | 90    | <b>55</b>                        | 70    | 80    | <b>.44</b>                   | .42   | .47   | <b>26</b>                        | 38    | 38    |
| 2-Wk FU     | <b>180</b>                       | 194   | 185   | <b>107</b>                      | 112   | 109   | <b>73</b>                        | 82    | 76    | <b>.41</b>                   | .42   | .41   | <b>46</b>                        | 39    | 44    |
| 6-Wk FU     | <b>150</b>                       | 195   | 204   | <b>83</b>                       | 112   | 128   | <b>67</b>                        | 83    | 76    | <b>.45</b>                   | .43   | .37   | <b>35</b>                        | 50    | 60    |
|             | Nouns Requiring Determiner (NRD) |       |       | NRD with Determiner             |       |       | Determiner Index                 |       |       | Pronoun Count                |       |       | Noun:Pronoun Ratio               |       |       |
|             | Set 1                            | Set 2 | Set 3 | Set 1                           | Set 2 | Set 3 | Set 1                            | Set 2 | Set 3 | Set 1                        | Set 2 | Set 3 | Set 1                            | Set 2 | Set 3 |
| Baseline 1  | <b>13</b>                        | 17    | 17    | <b>4</b>                        | 8     | 4     | <b>.31</b>                       | .47   | .24   | <b>1</b>                     | 0     | 0     | <b>16</b>                        | 0     | 0     |
| Baseline 2  | <b>16</b>                        | 13    | 17    | <b>2</b>                        | 7     | 6     | <b>.13</b>                       | .54   | .35   | <b>3</b>                     | 5     | 1     | <b>6.67</b>                      | 3.60  | 19.0  |
| Baseline 3  | <b>14</b>                        | 16    | 11    | <b>4</b>                        | 7     | 3     | <b>.29</b>                       | .44   | .27   | <b>3</b>                     | 0     | 5     | <b>6.0</b>                       | 0     | 3.60  |
| Treatment 1 | <b>15</b>                        | 18    | 23    | <b>15</b>                       | 17    | 15    | <b>1.0</b>                       | .94   | .65   | <b>3</b>                     | 2     | 5     | <b>6.67</b>                      | 15.50 | 4.60  |
| Treatment 2 | <b>20</b>                        | 25    | 20    | <b>19</b>                       | 19    | 19    | <b>.95</b>                       | .76   | .95   | <b>7</b>                     | 20    | 13    | <b>3.71</b>                      | 1.90  | 2.92  |
| 2-Wk FU     | <b>25</b>                        | 26    | 25    | <b>21</b>                       | 23    | 23    | <b>.84</b>                       | .88   | .92   | <b>11</b>                    | 18    | 12    | <b>4.18</b>                      | 2.17  | 3.67  |
| 6-Wk FU     | <b>21</b>                        | 31    | 28    | <b>21</b>                       | 29    | 22    | <b>1.0</b>                       | .94   | .79   | <b>6</b>                     | 3     | 9     | <b>5.83</b>                      | 16.67 | 6.67  |
|             | Verb Count                       |       |       | Noun:Verb Ratio                 |       |       | Verbs Requiring Inflection (VRI) |       |       | VRI with Inflection          |       |       | Inflection Index                 |       |       |
|             | Set 1                            | Set 2 | Set 3 | Set 1                           | Set 2 | Set 3 | Set 1                            | Set 2 | Set 3 | Set 1                        | Set 2 | Set 3 | Set 1                            | Set 2 | Set 3 |
| Baseline 1  | <b>17</b>                        | 8     | 8     | <b>0.94</b>                     | 2.25  | 2.38  | <b>17</b>                        | 8     | 8     | <b>2</b>                     | 1     | 0     | <b>.12</b>                       | .13   | 0     |
| Baseline 2  | <b>8</b>                         | 12    | 7     | <b>2.50</b>                     | 1.50  | 2.71  | <b>7</b>                         | 5     | 6     | <b>3</b>                     | 1     | 3     | <b>.43</b>                       | .20   | .50   |
| Baseline 3  | <b>11</b>                        | 8     | 11    | <b>1.64</b>                     | 2.13  | 1.64  | <b>8</b>                         | 8     | 11    | <b>6</b>                     | 8     | 10    | <b>.75</b>                       | 1.0   | .91   |
| Treatment 1 | <b>32</b>                        | 31    | 23    | <b>0.63</b>                     | 1.0   | 1.0   | <b>20</b>                        | 15    | 16    | <b>12</b>                    | 14    | 13    | <b>.60</b>                       | .93   | .81   |
| Treatment 2 | <b>38</b>                        | 46    | 34    | <b>0.68</b>                     | 0.83  | 1.12  | <b>16</b>                        | 12    | 18    | <b>14</b>                    | 9     | 16    | <b>.88</b>                       | .75   | .89   |
| 2-Wk FU     | <b>35</b>                        | 47    | 43    | <b>1.31</b>                     | 0.83  | 1.02  | <b>15</b>                        | 11    | 17    | <b>11</b>                    | 11    | 10    | <b>.73</b>                       | 1.0   | .59   |
| 6-Wk FU     | <b>37</b>                        | 32    | 39    | <b>0.95</b>                     | 1.56  | 1.54  | <b>24</b>                        | 18    | 21    | <b>16</b>                    | 17    | 20    | <b>.67</b>                       | .94   | .95   |
|             | Total Auxiliary Score            |       |       | Auxiliary Complexity Index      |       |       | Sentence Count                   |       |       | Number of Words in Sentences |       |       | Proportion of Words in Sentences |       |       |
|             | Set 1                            | Set 2 | Set 3 | Set 1                           | Set 2 | Set 3 | Set 1                            | Set 2 | Set 3 | Set 1                        | Set 2 | Set 3 | Set 1                            | Set 2 | Set 3 |
| Baseline 1  | <b>19</b>                        | 9     | 8     | <b>0.12</b>                     | 0.13  | 0     | <b>8</b>                         | 7     | 8     | <b>40</b>                    | 37    | 36    | <b>.82</b>                       | .79   | .75   |
| Baseline 2  | <b>10</b>                        | 13    | 10    | <b>0.25</b>                     | 0.44  | 0.43  | <b>6</b>                         | 9     | 8     | <b>21</b>                    | 40    | 34    | <b>.55</b>                       | .89   | .85   |
| Baseline 3  | <b>14</b>                        | 8     | 16    | <b>0.56</b>                     | 0     | 0.60  | <b>9</b>                         | 8     | 7     | <b>39</b>                    | 41    | 21    | <b>.85</b>                       | .95   | .51   |
| Treatment 1 | <b>45</b>                        | 40    | 35    | <b>1.14</b>                     | 1.67  | 1.19  | <b>10</b>                        | 12    | 13    | <b>79</b>                    | 105   | 87    | <b>.74</b>                       | .72   | .90   |
| Treatment 2 | <b>53</b>                        | 54    | 36    | <b>1.65</b>                     | 1.16  | 1.0   | <b>14</b>                        | 24    | 18    | <b>102</b>                   | 148   | 149   | <b>.82</b>                       | .89   | .88   |
| 2-Wk FU     | <b>46</b>                        | 57    | 52    | <b>1.30</b>                     | 1.28  | 1.08  | <b>16</b>                        | 24    | 17    | <b>124</b>                   | 161   | 124   | <b>.69</b>                       | .83   | .67   |
| 6-Wk FU     | <b>51</b>                        | 18    | 58    | <b>1.13</b>                     | 1.0   | 1.64  | <b>11</b>                        | 16    | 14    | <b>92</b>                    | 135   | 125   | <b>.61</b>                       | .69   | .61   |
|             | Mean Sentence Length             |       |       | Number of Well-Formed Sentences |       |       | Prop. of Well-Formed Sentences   |       |       | Embedded Clause Count        |       |       | Embedding Index                  |       |       |
|             | Set 1                            | Set 2 | Set 3 | Set 1                           | Set 2 | Set 3 | Set 1                            | Set 2 | Set 3 | Set 1                        | Set 2 | Set 3 | Set 1                            | Set 2 | Set 3 |
| Baseline 1  | <b>5.0</b>                       | 5.29  | 4.50  | <b>0</b>                        | 0     | 0     | <b>0</b>                         | 0     | 0     | <b>0</b>                     | 0     | 0     | <b>0</b>                         | 0     | 0     |
| Baseline 2  | <b>3.50</b>                      | 4.44  | 4.25  | <b>0</b>                        | 4     | 0     | <b>0</b>                         | .44   | 0     | <b>0</b>                     | 0     | 0     | <b>0</b>                         | 0     | 0     |
| Baseline 3  | <b>4.33</b>                      | 5.13  | 3.0   | <b>1</b>                        | 0     | 0     | <b>.11</b>                       | 0     | 0     | <b>0</b>                     | 0     | 0     | <b>0</b>                         | 0     | 0     |
| Treatment 1 | <b>7.90</b>                      | 8.75  | 6.69  | <b>8</b>                        | 9     | 5     | <b>.80</b>                       | .75   | .38   | <b>0</b>                     | 3     | 0     | <b>0</b>                         | .25   | 0     |
| Treatment 2 | <b>7.29</b>                      | 6.17  | 8.28  | <b>12</b>                       | 14    | 10    | <b>.86</b>                       | .58   | .56   | <b>0</b>                     | 0     | 2     | <b>0</b>                         | 0     | .11   |
| 2-Wk FU     | <b>7.75</b>                      | 6.71  | 7.29  | <b>12</b>                       | 16    | 11    | <b>.75</b>                       | .67   | .65   | <b>2</b>                     | 1     | 2     | <b>.13</b>                       | .04   | .12   |
| 6-Wk FU     | <b>8.37</b>                      | 8.44  | 8.93  | <b>9</b>                        | 11    | 9     | <b>.82</b>                       | .69   | .64   | <b>1</b>                     | 2     | 3     | <b>.09</b>                       | .13   | .21   |



## Participant 7

| Probe       | Total Narrative Words            |       |             | Open-Class Word Count           |       |             | Closed-Class (CC) Word Count     |       |            | Proportion CC Words          |       |            | Noun Count                       |       |             |
|-------------|----------------------------------|-------|-------------|---------------------------------|-------|-------------|----------------------------------|-------|------------|------------------------------|-------|------------|----------------------------------|-------|-------------|
|             | Set 1                            | Set 2 | Set 3       | Set 1                           | Set 2 | Set 3       | Set 1                            | Set 2 | Set 3      | Set 1                        | Set 2 | Set 3      | Set 1                            | Set 2 | Set 3       |
| Baseline 1  | 49                               | 53    | <b>62</b>   | 33                              | 30    | <b>38</b>   | 16                               | 23    | <b>24</b>  | .33                          | .43   | <b>.39</b> | 20                               | 17    | <b>20</b>   |
| Baseline 2  | 50                               | 53    | <b>55</b>   | 32                              | 28    | <b>33</b>   | 18                               | 25    | <b>22</b>  | .36                          | .47   | <b>.40</b> | 17                               | 17    | <b>18</b>   |
| Baseline 3  | 38                               | 50    | <b>56</b>   | 23                              | 26    | <b>33</b>   | 15                               | 24    | <b>23</b>  | .39                          | .48   | <b>.41</b> | 13                               | 15    | <b>18</b>   |
| Treatment 1 | 110                              | 40    | <b>55</b>   | 61                              | 24    | <b>34</b>   | 49                               | 16    | <b>21</b>  | .45                          | .40   | <b>.38</b> | 39                               | 16    | <b>21</b>   |
| Treatment 2 | 105                              | 124   | <b>43</b>   | 47                              | 61    | <b>24</b>   | 58                               | 63    | <b>19</b>  | .55                          | .51   | <b>.44</b> | 30                               | 32    | <b>12</b>   |
| 2-Wk FU     | 71                               | 130   | <b>40</b>   | 34                              | 64    | <b>23</b>   | 37                               | 66    | <b>17</b>  | .52                          | .51   | <b>.43</b> | 22                               | 31    | <b>12</b>   |
| 6-Wk FU     | 91                               | 122   | <b>52</b>   | 45                              | 61    | <b>30</b>   | 46                               | 61    | <b>22</b>  | .51                          | .50   | <b>.42</b> | 28                               | 31    | <b>13</b>   |
|             | Nouns Requiring Determiner (NRD) |       |             | NRD with Determiner             |       |             | Determiner Index                 |       |            | Pronoun Count                |       |            | Noun:Pronoun Ratio               |       |             |
|             | Set 1                            | Set 2 | Set 3       | Set 1                           | Set 2 | Set 3       | Set 1                            | Set 2 | Set 3      | Set 1                        | Set 2 | Set 3      | Set 1                            | Set 2 | Set 3       |
| Baseline 1  | 13                               | 15    | <b>16</b>   | 12                              | 13    | <b>16</b>   | .92                              | .87   | <b>1.0</b> | 0                            | 2     | <b>1</b>   | 0                                | 8.50  | <b>20.0</b> |
| Baseline 2  | 15                               | 15    | <b>15</b>   | 11                              | 15    | <b>14</b>   | .73                              | 1.0   | <b>.93</b> | 0                            | 5     | <b>0</b>   | 0                                | 3.40  | <b>0</b>    |
| Baseline 3  | 13                               | 14    | <b>18</b>   | 11                              | 13    | <b>17</b>   | .85                              | .93   | <b>.94</b> | 0                            | 0     | <b>0</b>   | 0                                | 0     | <b>0</b>    |
| Treatment 1 | 29                               | 11    | <b>16</b>   | 26                              | 10    | <b>15</b>   | .90                              | .91   | <b>.94</b> | 2                            | 0     | <b>1</b>   | 19.50                            | 0     | <b>21.0</b> |
| Treatment 2 | 24                               | 28    | <b>12</b>   | 24                              | 28    | <b>11</b>   | 1.0                              | 1.0   | <b>.92</b> | 7                            | 11    | <b>0</b>   | 4.29                             | 2.91  | <b>0</b>    |
| 2-Wk FU     | 19                               | 25    | <b>11</b>   | 19                              | 25    | <b>11</b>   | 1.0                              | 1.0   | <b>1.0</b> | 2                            | 13    | <b>0</b>   | 11                               | 2.38  | <b>0</b>    |
| 6-Wk FU     | 23                               | 26    | <b>11</b>   | 22                              | 26    | <b>10</b>   | .96                              | 1.0   | <b>.91</b> | 6                            | 11    | <b>5</b>   | 4.67                             | 2.82  | <b>2.60</b> |
|             | Verb Count                       |       |             | Noun:Verb Ratio                 |       |             | Verbs Requiring Inflection (VRI) |       |            | VRI with Inflection          |       |            | Inflection Index                 |       |             |
|             | Set 1                            | Set 2 | Set 3       | Set 1                           | Set 2 | Set 3       | Set 1                            | Set 2 | Set 3      | Set 1                        | Set 2 | Set 3      | Set 1                            | Set 2 | Set 3       |
| Baseline 1  | 10                               | 10    | <b>16</b>   | 2.0                             | 1.70  | <b>1.25</b> | 10                               | 10    | <b>16</b>  | 10                           | 10    | <b>13</b>  | 1.0                              | 1.0   | <b>.81</b>  |
| Baseline 2  | 12                               | 10    | <b>12</b>   | 1.42                            | 1.70  | <b>1.50</b> | 12                               | 10    | <b>12</b>  | 12                           | 10    | <b>12</b>  | 1.0                              | 1.0   | <b>1.0</b>  |
| Baseline 3  | 10                               | 10    | <b>13</b>   | 1.30                            | 1.50  | <b>1.38</b> | 10                               | 10    | <b>13</b>  | 10                           | 9     | <b>13</b>  | 1.0                              | .90   | <b>1.0</b>  |
| Treatment 1 | 12                               | 8     | <b>10</b>   | 3.25                            | 2.0   | <b>2.10</b> | 12                               | 8     | <b>10</b>  | 12                           | 7     | <b>10</b>  | 1.0                              | .88   | <b>1.0</b>  |
| Treatment 2 | 16                               | 21    | <b>10</b>   | 1.88                            | 1.52  | <b>1.20</b> | 16                               | 21    | <b>10</b>  | 16                           | 21    | <b>10</b>  | 1.0                              | 1.0   | <b>1.0</b>  |
| 2-Wk FU     | 11                               | 24    | <b>9</b>    | 2.0                             | 1.29  | <b>1.33</b> | 11                               | 23    | <b>9</b>   | 11                           | 23    | <b>9</b>   | 1.0                              | 1.0   | <b>1.0</b>  |
| 6-Wk FU     | 14                               | 21    | <b>14</b>   | 2.0                             | 1.48  | <b>0.93</b> | 14                               | 21    | <b>14</b>  | 14                           | 21    | <b>14</b>  | 1.0                              | 1.0   | <b>1.0</b>  |
|             | Total Auxiliary Score            |       |             | Auxiliary Complexity Index      |       |             | Sentence Count                   |       |            | Number of Words in Sentences |       |            | Proportion of Words in Sentences |       |             |
|             | Set 1                            | Set 2 | Set 3       | Set 1                           | Set 2 | Set 3       | Set 1                            | Set 2 | Set 3      | Set 1                        | Set 2 | Set 3      | Set 1                            | Set 2 | Set 3       |
| Baseline 1  | 30                               | 32    | <b>46</b>   | 2.0                             | 2.20  | <b>1.88</b> | 9                                | 8     | <b>14</b>  | 43                           | 33    | <b>58</b>  | .88                              | .62   | <b>.94</b>  |
| Baseline 2  | 30                               | 34    | <b>36</b>   | 2.0                             | 2.40  | <b>2.0</b>  | 10                               | 10    | <b>12</b>  | 41                           | 50    | <b>46</b>  | .82                              | .94   | <b>.84</b>  |
| Baseline 3  | 28                               | 33    | <b>32</b>   | 1.80                            | 2.30  | <b>1.67</b> | 10                               | 10    | <b>13</b>  | 36                           | 46    | <b>48</b>  | .95                              | .92   | <b>.86</b>  |
| Treatment 1 | 40                               | 23    | <b>29</b>   | 2.33                            | 1.88  | <b>1.90</b> | 12                               | 8     | <b>10</b>  | 78                           | 34    | <b>41</b>  | .71                              | .85   | <b>.75</b>  |
| Treatment 2 | 50                               | 61    | <b>30</b>   | 2.13                            | 2.05  | <b>2.0</b>  | 16                               | 19    | <b>10</b>  | 94                           | 124   | <b>39</b>  | .90                              | 1.0   | <b>.91</b>  |
| 2-Wk FU     | 30                               | 65    | <b>23</b>   | 1.73                            | 1.95  | <b>1.56</b> | 11                               | 22    | <b>9</b>   | 68                           | 130   | <b>39</b>  | .96                              | 1.0   | <b>.98</b>  |
| 6-Wk FU     | 40                               | 55    | <b>31</b>   | 1.86                            | 1.75  | <b>1.21</b> | 14                               | 20    | <b>14</b>  | 79                           | 119   | <b>52</b>  | .87                              | .98   | <b>1.0</b>  |
|             | Mean Sentence Length             |       |             | Number of Well-Formed Sentences |       |             | Prop. of Well-Formed Sentences   |       |            | Embedded Clause Count        |       |            | Embedding Index                  |       |             |
|             | Set 1                            | Set 2 | Set 3       | Set 1                           | Set 2 | Set 3       | Set 1                            | Set 2 | Set 3      | Set 1                        | Set 2 | Set 3      | Set 1                            | Set 2 | Set 3       |
| Baseline 1  | 4.78                             | 4.13  | <b>4.14</b> | 5                               | 6     | <b>9</b>    | .56                              | .75   | <b>.64</b> | 0                            | 0     | <b>0</b>   | 0                                | 0     | <b>0</b>    |
| Baseline 2  | 4.10                             | 5.0   | <b>3.83</b> | 5                               | 6     | <b>5</b>    | .50                              | .60   | <b>.42</b> | 0                            | 0     | <b>0</b>   | 0                                | 0     | <b>0</b>    |
| Baseline 3  | 3.60                             | 4.60  | <b>3.69</b> | 5                               | 4     | <b>5</b>    | .50                              | .40   | <b>.38</b> | 0                            | 0     | <b>0</b>   | 0                                | 0     | <b>0</b>    |
| Treatment 1 | 6.50                             | 4.25  | <b>4.10</b> | 10                              | 3     | <b>8</b>    | .83                              | .38   | <b>.80</b> | 0                            | 0     | <b>0</b>   | 0                                | 0     | <b>0</b>    |
| Treatment 2 | 5.88                             | 6.53  | <b>3.90</b> | 10                              | 19    | <b>6</b>    | .63                              | 1.0   | <b>.60</b> | 0                            | 1     | <b>0</b>   | 0                                | .05   | <b>0</b>    |
| 2-Wk FU     | 6.18                             | 5.91  | <b>4.33</b> | 7                               | 20    | <b>6</b>    | .64                              | .91   | <b>.67</b> | 0                            | 1     | <b>0</b>   | 0                                | .05   | <b>0</b>    |
| 6-Wk FU     | 5.64                             | 5.95  | <b>3.71</b> | 13                              | 17    | <b>10</b>   | .93                              | .85   | <b>.71</b> | 0                            | 1     | <b>0</b>   | 0                                | .05   | <b>0</b>    |

## Participant 8

| Probe       | Total Narrative Words            |       |             | Open-Class Word Count           |       |             | Closed-Class (CC) Word Count     |       |            | Proportion CC Words          |       |            | Noun Count                       |       |              |
|-------------|----------------------------------|-------|-------------|---------------------------------|-------|-------------|----------------------------------|-------|------------|------------------------------|-------|------------|----------------------------------|-------|--------------|
|             | Set 1                            | Set 2 | Set 3       | Set 1                           | Set 2 | Set 3       | Set 1                            | Set 2 | Set 3      | Set 1                        | Set 2 | Set 3      | Set 1                            | Set 2 | Set 3        |
| Baseline 1  | 40                               | 46    | <b>43</b>   | 39                              | 43    | <b>40</b>   | 1                                | 3     | <b>3</b>   | .03                          | .07   | <b>.07</b> | 24                               | 26    | <b>20</b>    |
| Baseline 2  | 34                               | 34    | <b>31</b>   | 33                              | 33    | <b>28</b>   | 1                                | 1     | <b>3</b>   | .03                          | .03   | <b>.10</b> | 20                               | 20    | <b>18</b>    |
| Baseline 3  | 39                               | 36    | <b>37</b>   | 38                              | 34    | <b>36</b>   | 1                                | 2     | <b>1</b>   | .03                          | .06   | <b>.03</b> | 26                               | 22    | <b>21</b>    |
| Treatment 1 | 68                               | 124   | <b>67</b>   | 49                              | 86    | <b>52</b>   | 19                               | 38    | <b>15</b>  | .28                          | .31   | <b>.22</b> | 21                               | 50    | <b>34</b>    |
| Treatment 2 | 156                              | 131   | <b>91</b>   | 100                             | 88    | <b>67</b>   | 56                               | 43    | <b>24</b>  | .36                          | .33   | <b>.26</b> | 59                               | 52    | <b>30</b>    |
| 2-Wk FU     | 103                              | 133   | <b>90</b>   | 73                              | 89    | <b>69</b>   | 30                               | 44    | <b>21</b>  | .29                          | .33   | <b>.23</b> | 44                               | 57    | <b>35</b>    |
| 6-Wk FU     | 118                              | 129   | <b>111</b>  | 84                              | 93    | <b>82</b>   | 34                               | 36    | <b>29</b>  | .29                          | .28   | <b>.26</b> | 50                               | 63    | <b>44</b>    |
|             | Nouns Requiring Determiner (NRD) |       |             | NRD with Determiner             |       |             | Determiner Index                 |       |            | Pronoun Count                |       |            | Noun:Pronoun Ratio               |       |              |
|             | Set 1                            | Set 2 | Set 3       | Set 1                           | Set 2 | Set 3       | Set 1                            | Set 2 | Set 3      | Set 1                        | Set 2 | Set 3      | Set 1                            | Set 2 | Set 3        |
| Baseline 1  | 6                                | 6     | <b>6</b>    | 0                               | 1     | <b>0</b>    | 0                                | .17   | <b>0</b>   | 1                            | 0     | <b>1</b>   | 24.0                             | 0     | <b>20.0</b>  |
| Baseline 2  | 5                                | 11    | <b>5</b>    | 0                               | 1     | <b>1</b>    | 0                                | .09   | <b>.20</b> | 0                            | 0     | <b>0</b>   | 0                                | 0     | <b>0</b>     |
| Baseline 3  | 5                                | 9     | <b>7</b>    | 4                               | 1     | <b>1</b>    | .80                              | .11   | <b>.14</b> | 0                            | 0     | <b>0</b>   | 0                                | 0     | <b>0</b>     |
| Treatment 1 | 18                               | 19    | <b>9</b>    | 1                               | 10    | <b>3</b>    | .06                              | .53   | <b>.33</b> | 0                            | 2     | <b>0</b>   | 0                                | 25.0  | <b>0</b>     |
| Treatment 2 | 26                               | 24    | <b>18</b>   | 10                              | 13    | <b>4</b>    | .38                              | .54   | <b>.22</b> | 2                            | 2     | <b>1</b>   | 29.5                             | 26.0  | <b>30.0</b>  |
| 2-Wk FU     | 22                               | 19    | <b>23</b>   | 4                               | 8     | <b>4</b>    | .18                              | .42   | <b>.17</b> | 2                            | 1     | <b>0</b>   | 22.0                             | 57.0  | <b>0</b>     |
| 6-Wk FU     | 18                               | 29    | <b>18</b>   | 6                               | 5     | <b>1</b>    | .33                              | .17   | <b>.06</b> | 2                            | 4     | <b>3</b>   | 25.0                             | 15.75 | <b>14.67</b> |
|             | Verb Count                       |       |             | Noun:Verb Ratio                 |       |             | Verbs Requiring Inflection (VRI) |       |            | VRI with Inflection          |       |            | Inflection Index                 |       |              |
|             | Set 1                            | Set 2 | Set 3       | Set 1                           | Set 2 | Set 3       | Set 1                            | Set 2 | Set 3      | Set 1                        | Set 2 | Set 3      | Set 1                            | Set 2 | Set 3        |
| Baseline 1  | 8                                | 7     | <b>8</b>    | 3.0                             | 3.71  | <b>2.50</b> | 8                                | 6     | <b>7</b>   | 7                            | 6     | <b>6</b>   | .88                              | 1.0   | <b>.86</b>   |
| Baseline 2  | 5                                | 6     | <b>5</b>    | 4.0                             | 3.33  | <b>3.60</b> | 5                                | 6     | <b>4</b>   | 4                            | 6     | <b>4</b>   | .80                              | 1.0   | <b>1.0</b>   |
| Baseline 3  | 4                                | 5     | <b>5</b>    | 6.50                            | 4.40  | <b>4.20</b> | 4                                | 5     | <b>5</b>   | 3                            | 5     | <b>5</b>   | .75                              | 1.0   | <b>1.0</b>   |
| Treatment 1 | 19                               | 17    | <b>9</b>    | 1.11                            | 2.94  | <b>3.78</b> | 19                               | 17    | <b>9</b>   | 18                           | 16    | <b>8</b>   | .95                              | .94   | <b>.89</b>   |
| Treatment 2 | 22                               | 15    | <b>19</b>   | 2.68                            | 3.47  | <b>1.58</b> | 22                               | 13    | <b>19</b>  | 21                           | 13    | <b>18</b>  | .95                              | 1.0   | <b>.95</b>   |
| 2-Wk FU     | 17                               | 14    | <b>17</b>   | 2.59                            | 4.07  | <b>2.06</b> | 15                               | 14    | <b>16</b>  | 14                           | 14    | <b>15</b>  | .93                              | 1.0   | <b>.94</b>   |
| 6-Wk FU     | 18                               | 10    | <b>20</b>   | 2.78                            | 6.30  | <b>2.20</b> | 16                               | 10    | <b>18</b>  | 16                           | 10    | <b>17</b>  | 1.0                              | 1.0   | <b>.94</b>   |
|             | Total Auxiliary Score            |       |             | Auxiliary Complexity Index      |       |             | Sentence Count                   |       |            | Number of Words in Sentences |       |            | Proportion of Words in Sentences |       |              |
|             | Set 1                            | Set 2 | Set 3       | Set 1                           | Set 2 | Set 3       | Set 1                            | Set 2 | Set 3      | Set 1                        | Set 2 | Set 3      | Set 1                            | Set 2 | Set 3        |
| Baseline 1  | 15                               | 13    | <b>14</b>   | 0.88                            | 0.86  | <b>0.75</b> | 2                                | 2     | <b>3</b>   | 5                            | 4     | <b>6</b>   | .13                              | .09   | <b>.14</b>   |
| Baseline 2  | 9                                | 12    | <b>9</b>    | 0.80                            | 1.0   | <b>0.80</b> | 2                                | 3     | <b>3</b>   | 5                            | 7     | <b>9</b>   | .15                              | .21   | <b>.29</b>   |
| Baseline 3  | 7                                | 10    | <b>10</b>   | 0.75                            | 1.0   | <b>1.0</b>  | 1                                | 4     | <b>2</b>   | 2                            | 10    | <b>6</b>   | .05                              | .28   | <b>.16</b>   |
| Treatment 1 | 29                               | 40    | <b>21</b>   | 0.61                            | 1.35  | <b>1.33</b> | 13                               | 10    | <b>5</b>   | 39                           | 56    | <b>22</b>  | .57                              | .45   | <b>.33</b>   |
| Treatment 2 | 47                               | 35    | <b>44</b>   | 1.14                            | 1.50  | <b>1.32</b> | 11                               | 11    | <b>12</b>  | 76                           | 77    | <b>46</b>  | .49                              | .59   | <b>.51</b>   |
| 2-Wk FU     | 35                               | 31    | <b>28</b>   | 1.33                            | 1.38  | <b>0.87</b> | 10                               | 9     | <b>12</b>  | 58                           | 48    | <b>49</b>  | .56                              | .36   | <b>.54</b>   |
| 6-Wk FU     | 38                               | 26    | <b>39</b>   | 1.24                            | 1.60  | <b>0.95</b> | 12                               | 9     | <b>14</b>  | 69                           | 53    | <b>47</b>  | .58                              | .41   | <b>.42</b>   |
|             | Mean Sentence Length             |       |             | Number of Well-Formed Sentences |       |             | Prop. of Well-Formed Sentences   |       |            | Embedded Clause Count        |       |            | Embedding Index                  |       |              |
|             | Set 1                            | Set 2 | Set 3       | Set 1                           | Set 2 | Set 3       | Set 1                            | Set 2 | Set 3      | Set 1                        | Set 2 | Set 3      | Set 1                            | Set 2 | Set 3        |
| Baseline 1  | 2.50                             | 2.0   | <b>2.0</b>  | 0                               | 1     | <b>1</b>    | 0                                | .50   | <b>.33</b> | 0                            | 0     | <b>0</b>   | 0                                | 0     | <b>0</b>     |
| Baseline 2  | 2.50                             | 2.33  | <b>3.0</b>  | 0                               | 0     | <b>1</b>    | 0                                | 0     | <b>.33</b> | 0                            | 0     | <b>0</b>   | 0                                | 0     | <b>0</b>     |
| Baseline 3  | 2.0                              | 2.50  | <b>3.0</b>  | 0                               | 0     | <b>0</b>    | 0                                | 0     | <b>0</b>   | 0                            | 0     | <b>0</b>   | 0                                | 0     | <b>0</b>     |
| Treatment 1 | 3.0                              | 5.60  | <b>4.40</b> | 0                               | 6     | <b>2</b>    | 0                                | .60   | <b>.40</b> | 1                            | 0     | <b>0</b>   | .08                              | 0     | <b>0</b>     |
| Treatment 2 | 6.91                             | 7.0   | <b>3.83</b> | 4                               | 4     | <b>0</b>    | .36                              | .36   | <b>0</b>   | 0                            | 0     | <b>0</b>   | 0                                | 0     | <b>0</b>     |
| 2-Wk FU     | 5.80                             | 5.33  | <b>4.08</b> | 3                               | 4     | <b>3</b>    | .30                              | .44   | <b>.25</b> | 1                            | 0     | <b>2</b>   | .10                              | 0     | <b>.17</b>   |
| 6-Wk FU     | 5.75                             | 5.89  | <b>3.36</b> | 6                               | 3     | <b>5</b>    | .50                              | .33   | <b>.36</b> | 0                            | 0     | <b>0</b>   | 0                                | 0     | <b>0</b>     |
