# Supplementary material
Source: publisher figshare collection journal article supplement (https://asha.figshare.com/articles/dataset/_/5912530)
Supplement: Supplementary file 2 [file 1]

### Supplemental Material S3. Distribution of novel content.

*Proportion (and total number) of novel words produced by participant and set.*

|    | Sets in<br>Order of<br>Treatment* | BL-<br>Unique | BL-<br>Shared | TX-<br>Unique | TX-<br>Shared | Total Post-<br>Treatment<br>Novel Words |
|----|-----------------------------------|---------------|---------------|---------------|---------------|-----------------------------------------|
| P1 | Set 1                             | .20           | .16           | <b>.43</b>    | .21           | 70                                      |
|    | Set 3                             | <b>.31</b>    | .23           | .25           | .21           | 48                                      |
|    | Set 2                             | <b>.27</b>    | .22           | <b>.27</b>    | .24           | 41                                      |
| P2 | Set 3                             | .05           | <b>.35</b>    | .30           | .30           | 20                                      |
|    | Set 1                             | .14           | <b>.29</b>    | <b>.29</b>    | <b>.29</b>    | 21                                      |
|    | Set 2                             | .00           | <b>.46</b>    | .08           | <b>.46</b>    | 13                                      |
| P3 | Set 1                             | .16           | .19           | <b>.41</b>    | .23           | 104                                     |
|    | Set 3                             | .11           | .15           | <b>.40</b>    | .33           | 105                                     |
|    | Set 2                             | .18           | .13           | <b>.40</b>    | .29           | 104                                     |
| P4 | Set 2                             | <b>.38</b>    | .06           | <b>.38</b>    | .18           | 34                                      |
|    | Set 3                             | .29           | .03           | <b>.35</b>    | .32           | 34                                      |
|    | Set 1                             | .20           | .07           | <b>.37</b>    | <b>.37</b>    | 30                                      |
| P5 | Set 2                             | .12           | .10           | <b>.53</b>    | .24           | 90                                      |
|    | Set 3                             | .14           | .11           | <b>.48</b>    | .27           | 83                                      |
|    | Set 1                             | .26           | .16           | .28           | <b>.30</b>    | 50                                      |
| P6 | Set 3                             | .13           | .21           | <b>.38</b>    | .28           | 39                                      |
|    | Set 2                             | .14           | .11           | <b>.57</b>    | .17           | 35                                      |
|    | Set 1                             | .21           | .24           | <b>.27</b>    | <b>.27</b>    | 33                                      |
| P7 | Set 1                             | .21           | .11           | <b>.45</b>    | .23           | 62                                      |
|    | Set 2                             | .19           | .13           | <b>.50</b>    | .18           | 68                                      |
|    | Set 3                             | <b>.41</b>    | .34           | .09           | .16           | 32                                      |
| P8 | Set 2                             | .12           | .07           | <b>.53</b>    | .28           | 129                                     |
|    | Set 1                             | .11           | .12           | <b>.46</b>    | .31           | 114                                     |
|    | Set 3                             | .13           | .12           | <b>.47</b>    | .28           | 95                                      |

*Note.* P = participant; BL = novel words that also occurred at baseline; TX = novel words that only occurred after treatment; Shared = novel words produced in response to more than one stimuli set; Unique = novel words only produced in response to a single stimuli set. The largest proportion(s) for each set are indicated in bold type.

\*Sets listed in order of treatment so that the third set listed is the untreated set, except for P6, which had treatment applied to all three sets.
