# Supplementary material
Source: publisher figshare collection journal article supplement (https://asha.figshare.com/articles/dataset/_/5912530)
Supplement: Supplementary file 3 [file 1]

## **Supplemental Material S1.** Examples of responses to picture stimuli during probing.

### Pretreatment

Participant 3 (in response to a picture of a man cutting a string): "He's cutting...he's cutting balloon."

Participant 4 (in response to a picture of a man smoking): "Sh and tat (hat)...and glasses...why er dat's (that's) all."

Participant 7 (in response to a picture of a man dropping a mug/cup): "The man was the cup. The pants was...the cap."

Participant 8 (in response to a picture of a man riding a horse): "Okay...horse running...up up running...guy... 'Slow Down!'...happy."

### Posttreatment

Participant 1 (in response to a picture of a woman lighting a candle): "A...*uh*...woman is lighting a match and she is lighting a candle."

Participant 4 (in response to a picture of a man running): "The guy is *x uh* guy is running to the bus because he is late."

Participant 5 (in response to a woman driving a car): "Da (the) man is going to...no...is going to...oh...dwibe dwibe...the man is going to dwibe (drive) on...no...in Big Lots...on on on on on da mobie (the movie)...on twee butts (three bucks)...an' den (then) is going to go home."

Participant 8 (in response to a picture of a woman cooking): "Mom is cooking a breakfast...*x*...potatoes *uh* gravy and biscuits...*um*...Sunday morning after church and friends *ah* no no no...friends and family."
